# Supplementary material
Source: publisher figshare collection journal article supplement (https://acs.figshare.com/ndownloader/files/4191103)

QUANTITATIVE 3-D ELEMENTAL MAPPING BY LA-ICP-MS OF BASALTIC CLAST  
FROM THE HANFORD 300 AREA, WASHINGTON, USA

Sheng Peng, Qinhong Hu\*, Robert P. Ewing, Chongxuan Liu, and John M. Zachara

**SUPPORTING INFORMATION**

**Contents**

1. Instrumentation and operating conditions

Table S1. Operation condition for LA-ICP-MS.

Table S2. Eight major composition percentages for 13 rocks.

Table S3. Point-by-point correlation between measured elements in the Hanford basaltic clast.

Figure S1. Instrumental response (signal intensity) to the liquid internal standards: Li, Sc, In, and Bi.

Figure S2. Calculated  $K^i$  values for each spot at each depth.  $K^i$  values are basically uniform in each layer except for some focused areas. High  $K^i$  values correspond to low sampling volume.

Figure S3. Average relative concentrations of intrinsic elements with depth.

Figure S4. 3-D maps for Ni, Mn, Zr, Rb, Th.

## 1. Instrumentation and operating conditions

A UP-213 laser ablation system (New Wave, Fremont, CA), interfaced with a PerkinElmer/SCIEX ELAN DRC II (Sheldon, CT) ICP-MS system, was used to characterize the elemental distribution in the basaltic clast sample. The liquid standards of 2 µg/L  $^6\text{Li}$ ,  $^{45}\text{Sc}$ ,  $^{115}\text{In}$ , and  $^{209}\text{Bi}$  were continuously introduced to monitor the ICP-MS stability and provide a basis for time-drift correction. During data acquisition, signal intensities (counts per second, CPS) were recorded for the contaminant elements of primary interest ( $^{238}\text{U}$ ,  $^{63}\text{Cu}$ , and  $^{27}\text{Al}$ ), other possible contaminants with lesser (or unknown) released amounts ( $^{51}\text{V}$ ,  $^{58}\text{Ni}$ ,  $^{137}\text{Ba}$ , and  $^{232}\text{Th}$ ), and several other elements intrinsic to the basalt with a range of atomic mass (e.g.,  $^{23}\text{Na}$ ,  $^{24}\text{Mg}$ ,  $^{29}\text{Si}$ ,  $^{39}\text{K}$ ,  $^{44}\text{Ca}$ ,  $^{54}\text{Fe}$ ,  $^{55}\text{Mn}$ ,  $^{85}\text{Rb}$ ,  $^{88}\text{Sr}$ , and  $^{90}\text{Zr}$ ). Please see Table S1 for more concrete operation conditions.

During a 7-second pause before laser firing, the measured signal intensity was used to determine the instrument background for each element. After laser firing, when the ablated sample reached the detector, there was a sharp rise in signal intensity, followed by a gradual return to background levels within a minute. After subtracting the background, the integrated signal intensity was obtained by adding all signals from this transient analysis. Differences in the integrated signal intensity of the elements reflect their differences in abundance/concentration within the ablated volume (1).

- (1) Hu, Q.; Kneafsey, T.J.; Wang, J.S.Y.; Tomutsa, L.; Roberts, J.J. Characterizing unsaturated diffusion in porous tuff gravels. *Vadose Zone J.* **2004**, 3, 1425–1438.

Table S1. Operation condition for LA-ICP-MS.

---

|                           |                                                  |
|---------------------------|--------------------------------------------------|
| <i>Laser ablation</i>     |                                                  |
| Laser system              | New Wave UP213; Tempest Nd:YAG                   |
| Wavelength                | 213 nm                                           |
| Output power (mJ)         | 2.8-3.0                                          |
| Ablation chamber          | New Wave SuperCell                               |
| Pulse duration (ns)       | 3-5                                              |
| Spot size (μm)            | 100                                              |
| Repetition rate (Hz)      | 20                                               |
| Pre-ablation time (s)     | 6-10                                             |
| <i>ICP-MS</i>             |                                                  |
| Spectrometer              | PerkinElmer Elan DRC II                          |
| Forward power (W)         | 1300                                             |
| Argon flow rate           |                                                  |
| Nebulizer Ar gas (L/min)  | 0.60                                             |
| LA carrier He gas (L/min) | 0.60                                             |
| Auxiliary gas (L/min)     | 0.95                                             |
| Cooling gas (L/min)       | 14.0                                             |
| Spray chamber             | cyclonic                                         |
| Nebulizer                 | Meinhard® type A                                 |
| Sample and skimmer cones  | Platinum                                         |
| Data acquisition mode     | Peak jumping                                     |
| Dwell time per peak (ms)  | 2 (Al, Si, and K), 5 (Na, Mg), 20 (all others)   |
| Acquisition duration (s)  | 30-60 (dependent on the numbers of laser pulses) |

---

Table S2. Eight major composition percentages for 13 rocks.

| ID | rock                                  | data source                                                                                                                      | major composition percentage |     |        |         |      |     |      |     | Mn      | sum<br>percentage |
|----|---------------------------------------|----------------------------------------------------------------------------------------------------------------------------------|------------------------------|-----|--------|---------|------|-----|------|-----|---------|-------------------|
|    |                                       |                                                                                                                                  | Si                           | Al  | Fe(II) | Fe(III) | Mg   | Ca  | Na   | K   |         |                   |
| 1  | basalt, Columbia River, Oregon, BCR-2 | USGS Certificate of Analysis                                                                                                     | 25.3                         | 7.1 | 0.0    | 9.7     | 2.2  | 5.1 | 2.3  | 1.5 | 0.0     | 53.2              |
| 2  | Costa Rica basalt                     | microprobe data from PSU                                                                                                         | 25.3                         | 9.2 | 5.2    | 0.0     | 1.8  | 6.4 | 2.0  | 1.1 | 0.1     | 51.2              |
| 3  | grimsel granodiorite                  | LTD progress Meeting; May 2007                                                                                                   | 31.6                         | 8.3 | 2.6    | 0.0     | 0.4  | 1.5 | 3.3  | 3.2 | 0.1     | 50.9              |
| 4  | stripa granite                        | Introduction to the hydrogeochemical investigations within the International Stripa Project; Nordstrom et al., GCA, 53:1717-1726 | 35.9                         | 7.4 | 0.0    | 0.9     | 0.2  | 0.5 | 3.0  | 3.8 | 0.0     | 51.8              |
| 5  | Andesite AGV-2                        | USGS Certificate of Analysis                                                                                                     | 27.7                         | 8.9 | 0.0    | 4.7     | 1.1  | 3.7 | 3.1  | 2.4 | 0.0     | 51.6              |
| 6  | Dunite DTS-2                          | USGS Certificate of Analysis                                                                                                     | 18.4                         | 0.2 | 0.0    | 5.4     | 29.8 | 0.1 | 0.0  | 0.0 | 0.0     | 54.0              |
| 7  | granite G-2                           | USGS Certificate of Analysis                                                                                                     | 32.3                         | 8.1 | 1.1    | 0.7     | 0.5  | 1.4 | 3.0  | 3.7 | 0.0     | 51.0              |
| 8  | granodiorite GSP-2                    | USGS Certificate of Analysis                                                                                                     | 31.1                         | 7.9 | 0.0    | 3.4     | 0.6  | 1.5 | 2.1  | 4.5 | 0.0     | 51.1              |
| 9  | quartz latite QLO-1                   | USGS Certificate of Analysis                                                                                                     | 30.7                         | 8.6 | 2.3    | 0.7     | 0.6  | 2.3 | 3.1  | 3.0 | 0.0     | 51.2              |
| 10 | rhyolite RGM-1                        | USGS Certificate of Analysis                                                                                                     | 34.3                         | 7.3 | 1.0    | 0.3     | 0.2  | 0.8 | 3.0  | 3.6 | 0.0     | 50.5              |
| 11 | shale SGR-1                           | USGS Certificate of Analysis                                                                                                     | 27.7                         | 8.9 | 0.0    | 4.7     | 1.1  | 3.7 | 3.1  | 2.4 | 0.0     | 51.6              |
| 12 | syenite STM-1                         | USGS Certificate of Analysis                                                                                                     | 27.9                         | 9.7 | 1.6    | 2.0     | 0.1  | 0.8 | 6.6  | 3.6 | 0.0     | 52.3              |
| 13 | NIST glass SRM 610                    |                                                                                                                                  | 33.7                         | 1.1 |        |         |      | 8.6 | 10.4 |     |         | 53.7              |
|    |                                       |                                                                                                                                  |                              |     |        |         |      |     |      |     | Average | 51.8              |
|    |                                       |                                                                                                                                  |                              |     |        |         |      |     |      |     | STDEV   | 1.1               |

Table S3. Point-by-point correlation between measured elements in the Hanford basaltic clast.

|    | Na | Mg    | Al    | Si    | K     | Ca    | V     | Fe    | Mn    | Ni    | Cu    | Rb    | Sr    | Zr    | Ba    | Ce    | Pb    | Th    | U     |
|----|----|-------|-------|-------|-------|-------|-------|-------|-------|-------|-------|-------|-------|-------|-------|-------|-------|-------|-------|
| Na |    | -0.78 | 0.77  | -0.09 | 0.28  | -0.58 | -0.11 | -0.27 | -0.33 | -0.26 | -0.09 | 0.09  | 0.69  | 0.07  | 0.38  | 0.05  | 0.01  | 0.16  | -0.05 |
| Mg |    |       | -0.85 | -0.21 | -0.39 | 0.73  | 0.1   | 0.27  | 0.33  | 0.26  | 0.03  | -0.15 | -0.69 | -0.17 | -0.44 | -0.16 | -0.01 | -0.31 | -0.05 |
| Al |    |       |       | -0.21 | 0.15  | -0.54 | -0.07 | -0.24 | -0.33 | -0.25 | -0.13 | -0.04 | 0.85  | 0.02  | 0.32  | -0.01 | -0.01 | 0.08  | -0.11 |
| Si |    |       |       |       | 0.43  | -0.6  | -0.19 | -0.16 | -0.16 | -0.15 | 0.1   | 0.38  | -0.31 | 0.2   | 0.14  | 0.15  | 0.01  | 0.37  | 0.2   |
| K  |    |       |       |       |       | -0.52 | 0     | -0.01 | -0.08 | -0.02 | 0.19  | 0.47  | 0.03  | 0.34  | 0.42  | 0.37  | 0.14  | 0.54  | 0.33  |
| Ca |    |       |       |       |       |       | -0.06 | 0.02  | 0.13  | 0.02  | -0.19 | -0.33 | -0.35 | -0.31 | -0.49 | -0.21 | -0.07 | -0.43 | -0.24 |
| V  |    |       |       |       |       |       |       | 0.9   | 0.58  | 0.89  | 0.41  | 0.01  | -0.12 | 0.27  | 0.17  | 0.19  | 0.08  | 0.14  | 0.28  |
| Fe |    |       |       |       |       |       |       |       | 0.68  | 0.97  | 0.58  | 0.04  | -0.25 | 0.35  | 0.18  | 0.26  | 0.14  | 0.15  | 0.4   |
| Mn |    |       |       |       |       |       |       |       |       | 0.69  | 0.53  | 0.03  | -0.25 | 0.33  | 0.26  | 0.47  | 0.18  | 0.22  | 0.6   |
| Ni |    |       |       |       |       |       |       |       |       |       | 0.61  | 0.05  | -0.23 | 0.36  | 0.19  | 0.26  | 0.1   | 0.15  | 0.4   |
| Cu |    |       |       |       |       |       |       |       |       |       |       | 0.23  | -0.07 | 0.38  | 0.45  | 0.35  | 0.17  | 0.26  | 0.63  |
| Rb |    |       |       |       |       |       |       |       |       |       |       |       | -0.09 | 0.29  | 0.27  | 0.29  | 0.11  | 0.38  | 0.32  |
| Sr |    |       |       |       |       |       |       |       |       |       |       |       |       | -0.06 | 0.37  | -0.01 | 0     | -0.03 | -0.08 |
| Zr |    |       |       |       |       |       |       |       |       |       |       |       |       |       | 0.35  | 0.42  | 0.11  | 0.65  | 0.46  |
| Ba |    |       |       |       |       |       |       |       |       |       |       |       |       |       |       | 0.54  | 0.18  | 0.47  | 0.5   |
| Ce |    |       |       |       |       |       |       |       |       |       |       |       |       |       |       |       | 0.21  | 0.62  | 0.59  |
| Pb |    |       |       |       |       |       |       |       |       |       |       |       |       |       |       |       |       | 0.17  | 0.31  |
| Th |    |       |       |       |       |       |       |       |       |       |       |       |       |       |       |       |       |       | 0.55  |

**Figure S1.** Instrumental response (signal intensity) to the liquid internal standards:  $^6\text{Li}$ ,  $^{45}\text{Sc}$ ,  $^{115}\text{In}$ , and  $^{209}\text{Bi}$

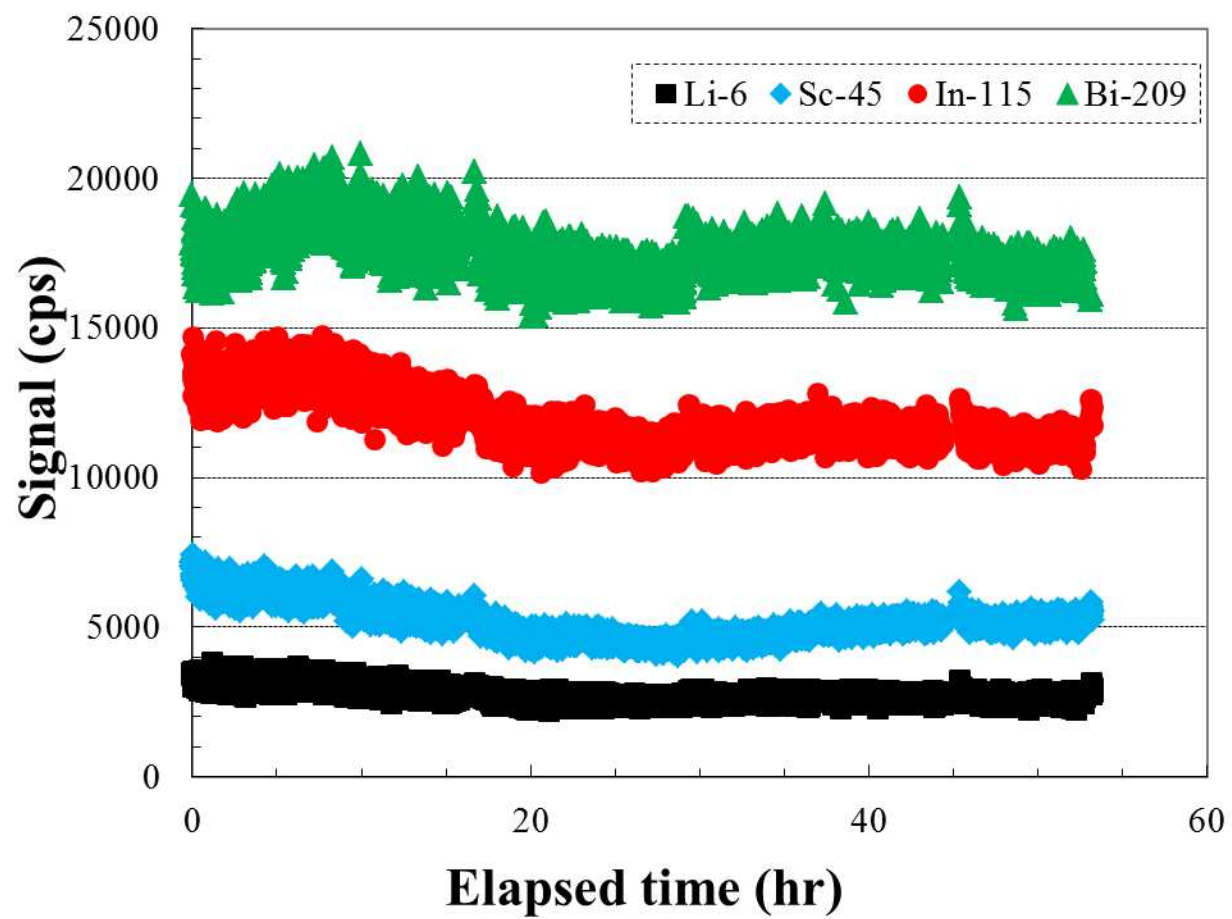

**Figure S2.** Calculated  $K^i$  values for each spot at each depth.  $K^i$  values are basically uniform in each layer except for some focused areas. High  $K^i$  values correspond to low sampling volume.

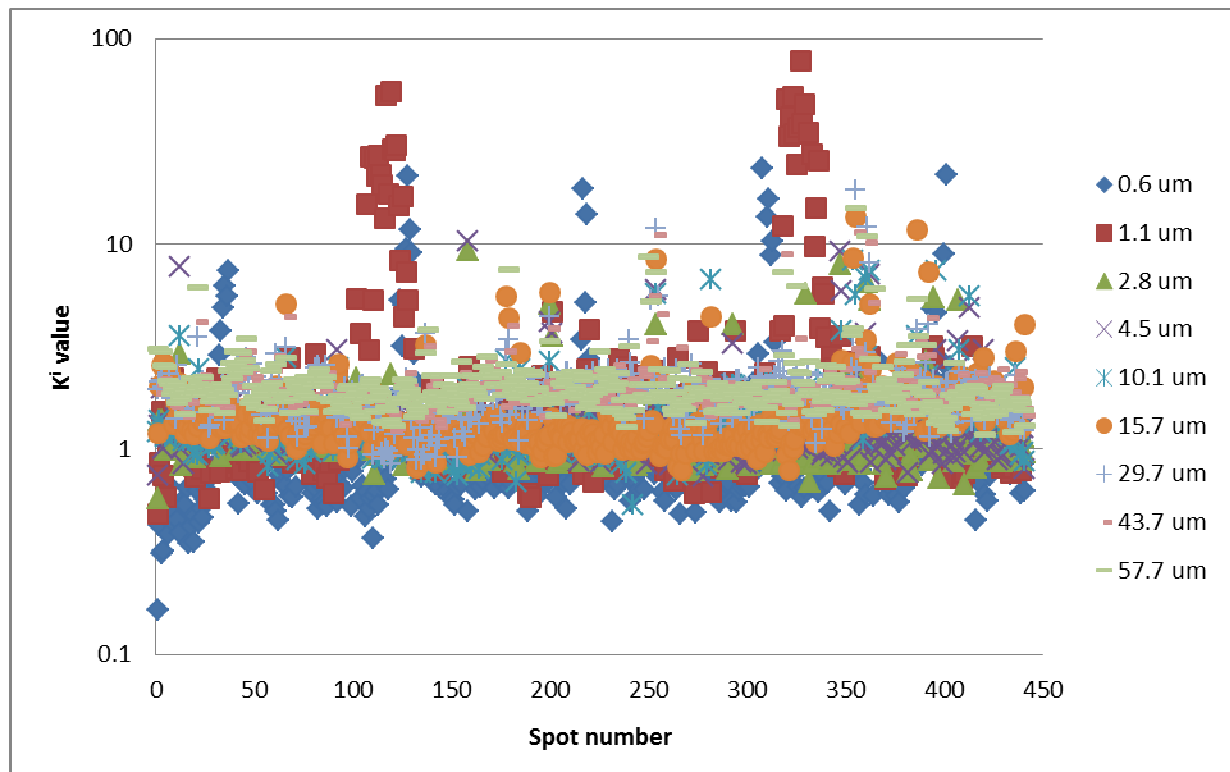

**Figure S3.** 3-D maps for V, Ni, Mn, Zr, Rb, Th.



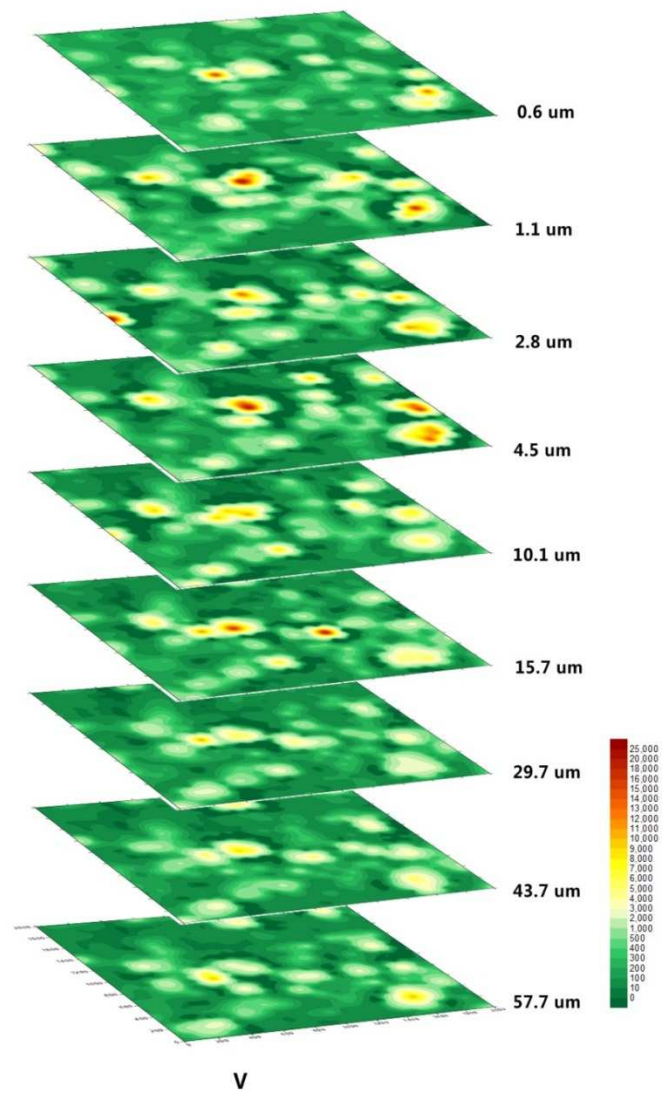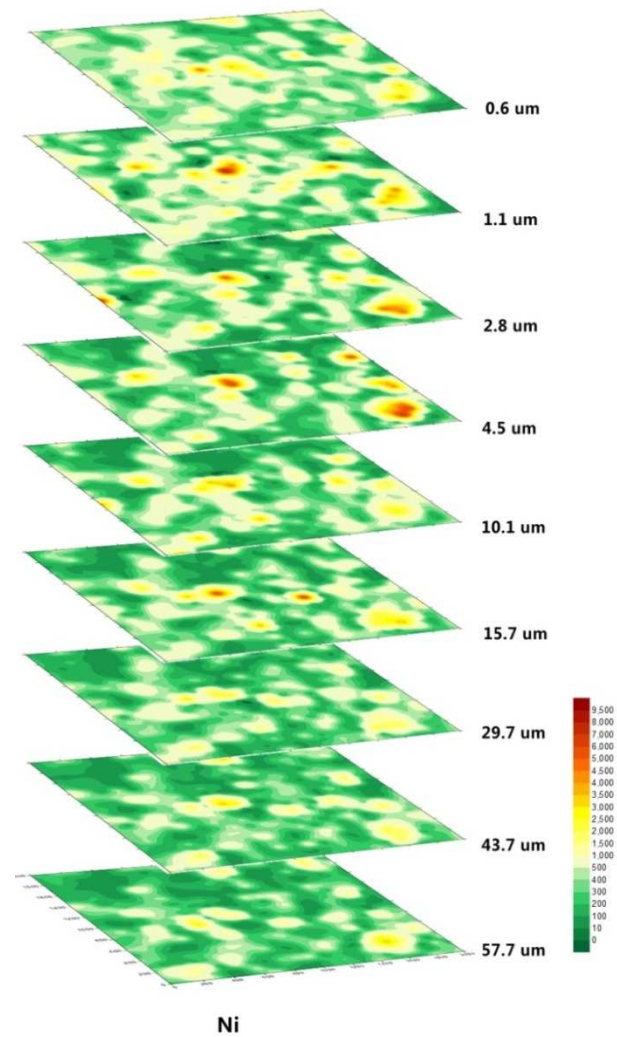

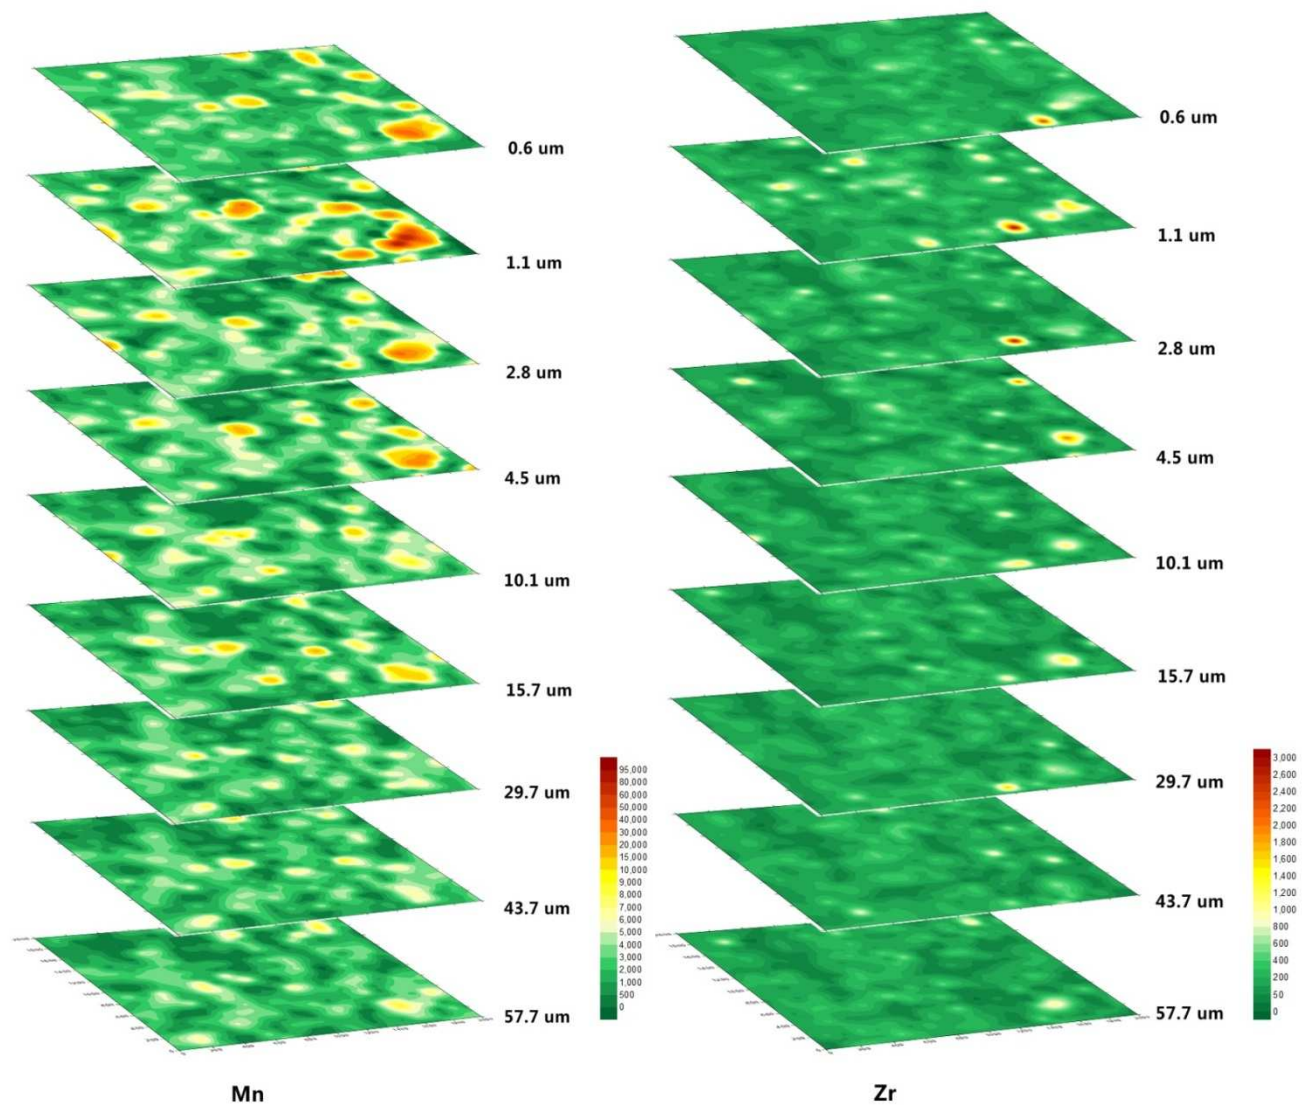

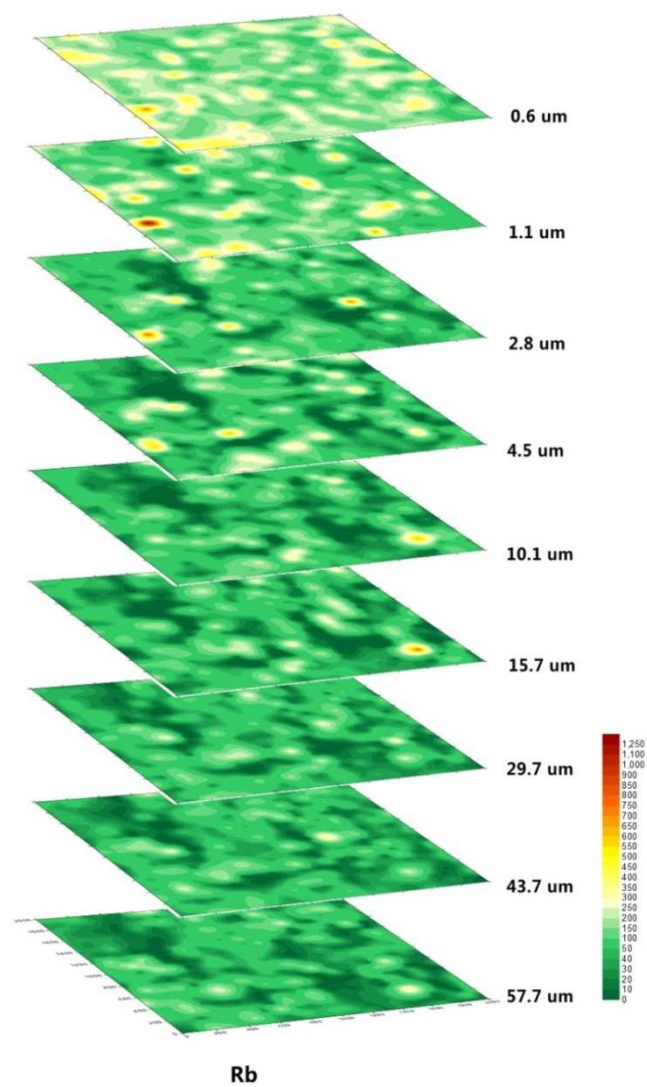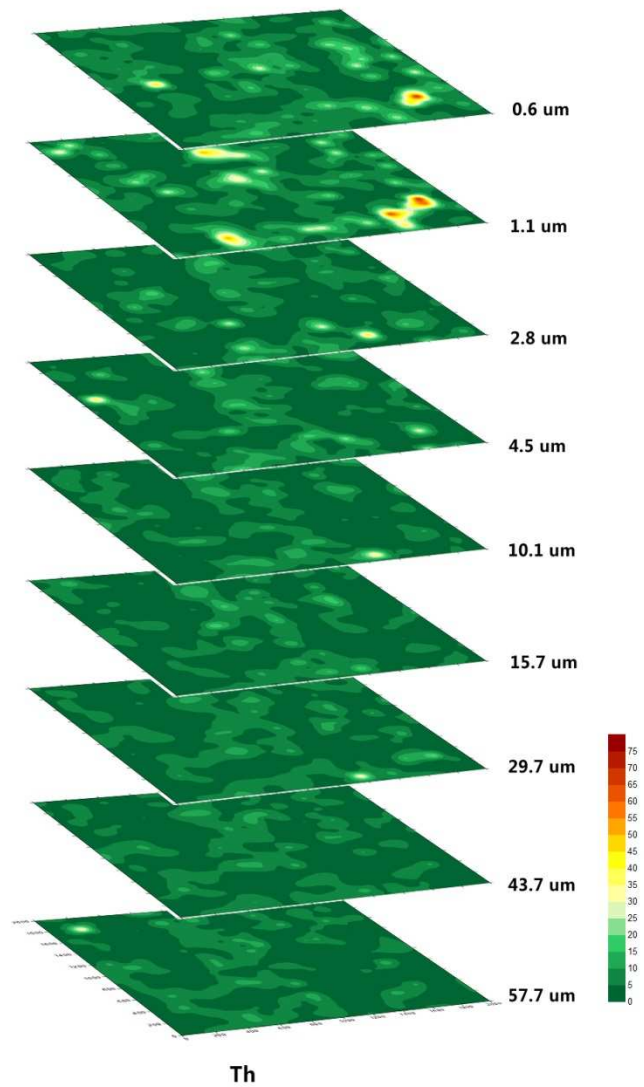

**Figure S4.** Average relative concentrations of intrinsic elements with depth.

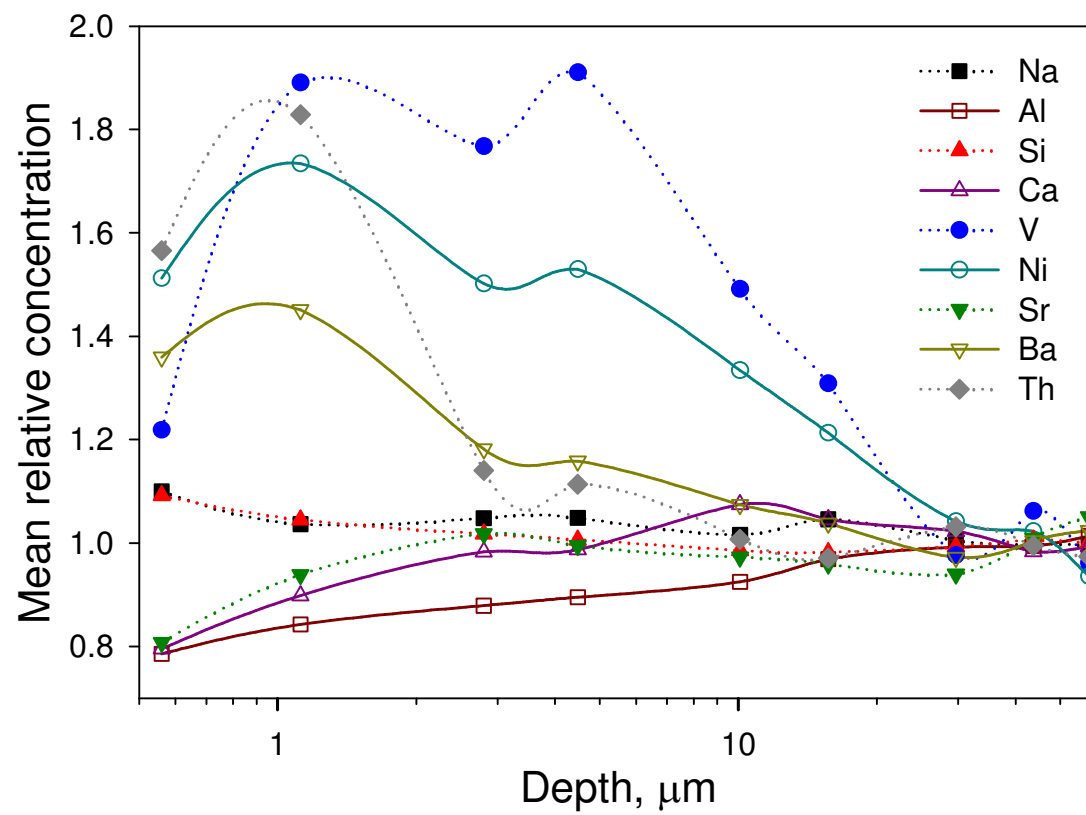

Supplement: Supplementary file 1 [file 4191103]
